# Supplementary material for: LncRNA LINC00240 suppresses invasion and migration in non-small cell lung cancer by sponging miR-7-5p
Source: BMC Cancer. 2021 Jan 9;21:44. doi: 10.1186/s12885-020-07755-8 (PMC7796488; doi:10.1186/s12885-020-07755-8)
Supplement: Supplementary file 1 — Additional file 1: Table S1. Total microarray data in miR-7-5p overexpression in H1299. [file 12885_2020_7755_MOESM1_ESM.xlsx]

## Sheet: Sheet1
Supplimentary Table 1.
Total microarray data in miR-7-5p overexpression in H1299
Fold chnage	Genbank	GeneSymbol	GeneName	P-value
0.0635012	ENST00000451755			0.0918667
0.10738	NM_153705	KDELC2	KDEL (Lys-Asp-Glu-Leu) containing 2	0.0717384
0.192729	lnc-COL9A1-1:1	lnc-COL9A1-1	lnc-COL9A1-1:1	0.0818366
0.203542	lnc-FKBP2-1:1	lnc-FKBP2-1	lnc-FKBP2-1:1	0.0831983
0.216445	NM_019896	POLE4	polymerase (DNA-directed), epsilon 4, accessory subunit	0.0820924
0.221651	NM_138639	BCL2L12	BCL2-like 12 (proline rich)	0.0826999
0.225528	NR_003015	SNORA53	small nucleolar RNA, H/ACA box 53	0.0892843
0.237867	XR_241404	LOC101928156	uncharacterized LOC101928156	0.0879209
0.249047	NR_120598	GACAT2	gastric cancer associated transcript 2 (non-protein coding)	0.0987484
0.249935	lnc-SMARCAL1-2:5	lnc-SMARCAL1-2	lnc-SMARCAL1-2:5	0.0926627
0.269329	NM_001673	ASNS	asparagine synthetase (glutamine-hydrolyzing)	0.0890737
0.26934	lnc-OPN4-1:2	lnc-OPN4-1	lnc-OPN4-1:2	0.104361
0.273309	TCONS_l2_00028188	XLOC_l2_014504		0.0898803
0.277679	NM_001077619	UBXN2B	UBX domain protein 2B	0.09148
0.282697	ENST00000452252	FAM204A	family with sequence similarity 204, member A	0.115827
0.285118	NM_016422	RNF141	ring finger protein 141	0.0940292
0.286392	lnc-APITD1-1:2	lnc-APITD1-1	lnc-APITD1-1:2	0.105824
0.292217	NM_022731	NUCKS1	nuclear casein kinase and cyclin-dependent kinase substrate 1	0.107848
0.292377	NM_006795	EHD1	EH-domain containing 1	0.0925233
0.295815	NM_018698	NXT2	nuclear transport factor 2-like export factor 2	0.1009
0.296402	NM_018366	BLOC1S4	biogenesis of lysosomal organelles complex-1, subunit 4, cappuccino	0.0945492
0.300951	NM_001077691	ALG9	ALG9, alpha-1,2-mannosyltransferase	0.120051
0.303882	NM_001006617	MAPKAP1	mitogen-activated protein kinase associated protein 1	0.0977812
0.314039	NM_001291831	SRRM3	serine/arginine repetitive matrix 3	0.0993675
0.314466	NM_032790	ORAI1	ORAI calcium release-activated calcium modulator 1	0.0962964
0.31814	NM_001034836	RDM1	RAD52 motif containing 1	0.097846
0.319742	NM_003615	SLC4A7	solute carrier family 4, sodium bicarbonate cotransporter, member 7	0.0972892
0.320488	XR_426894	LOC101930114	uncharacterized LOC101930114	0.0974209
0.32092	NM_001029885	CPTP	ceramide-1-phosphate transfer protein	0.0971623
0.32187	NM_001740	CALB2	calbindin 2	0.124296
0.322274	ENST00000439784			0.104554
0.328224	ENST00000518311			0.098397
0.331257	NM_005729	PPIF	peptidylprolyl isomerase F	0.098977
0.335053	lnc-FKBP2-1:2	lnc-FKBP2-1	lnc-FKBP2-1:2	0.100818
0.337566	NM_019896	POLE4	polymerase (DNA-directed), epsilon 4, accessory subunit	0.1001
0.34197	NM_177400	NKX6-2	NK6 homeobox 2	0.128438
0.349317	NM_138290	RUNDC3B	RUN domain containing 3B	0.136994
0.350169	NM_001142725	ERI2	ERI1 exoribonuclease family member 2	0.137805
0.350611	NR_044996	HCG23	HLA complex group 23 (non-protein coding)	0.134974
0.35182	NR_026668	VPS13A-AS1	VPS13A antisense RNA 1	0.17371
0.354878	TCONS_l2_00013180	XLOC_l2_007097		0.125726
0.355074	NM_006646	WASF3	WAS protein family, member 3	0.125125
0.357284	NM_025125	TMEM254	transmembrane protein 254	0.117321
0.357331	ENST00000610443	DHRS11	dehydrogenase/reductase (SDR family) member 11	0.136863
0.361178	NM_024093	C2orf49	chromosome 2 open reading frame 49	0.118738
0.362448	ENST00000470135	LOC340340	uncharacterized LOC340340	0.108417
0.363686	NM_207459	TEX19	testis expressed 19	0.106545
0.363886	ENST00000368309	UBQLN4	ubiquilin 4	0.111228
0.36461	NM_014285	EXOSC2	exosome component 2	0.113716
0.366166	NM_001029885	CPTP	ceramide-1-phosphate transfer protein	0.113563
0.366285	lnc-COPZ2-1:1	lnc-COPZ2-1	lnc-COPZ2-1:1	0.14932
0.366945	ENST00000534728			0.120004
0.368248	NM_000396	CTSK	cathepsin K	0.11358
0.36835	NR_033856	FLJ43315	asparagine synthetase pseudogene	0.109694
0.369445	NM_005026	PIK3CD	phosphatidylinositol-4,5-bisphosphate 3-kinase, catalytic subunit delta	0.107656
0.36977	NM_001013635	CCDC184	coiled-coil domain containing 184	0.112547
0.371209	NM_001029885	CPTP	ceramide-1-phosphate transfer protein	0.10648
0.372155	NM_022377	ICAM4	intercellular adhesion molecule 4 (Landsteiner-Wiener blood group)	0.1391
0.372519	NM_002880	RAF1	Raf-1 proto-oncogene, serine/threonine kinase	4.73949e-08
0.373792	NR_108031	LOC102577426	uncharacterized LOC102577426	0.135969
0.374879	NM_014331	SLC7A11	solute carrier family 7 (anionic amino acid transporter light chain, xc- system), member 11	0.12064
0.376154	NM_024052	GID4	GID complex subunit 4	0.107683
0.377377	NM_018248	NEIL3	nei endonuclease VIII-like 3 (E. coli)	0.140713
0.377604	NM_015463	CNRIP1	cannabinoid receptor interacting protein 1	0.109318
0.378728	NM_052957	ACRC	acidic repeat containing	0.12517
0.383584	NM_017443	POLE3	polymerase (DNA directed), epsilon 3, accessory subunit	0.109044
0.388306	NM_181832	NF2	neurofibromin 2 (merlin)	0.11
0.389076	NM_018715	RCC2	regulator of chromosome condensation 2	0.110155
0.390426	NM_032436	CHAMP1	chromosome alignment maintaining phosphoprotein 1	0.113458
0.391931	NM_024094	DSCC1	DNA replication and sister chromatid cohesion 1	0.111756
0.392323	NM_001013258	ZNF789	zinc finger protein 789	0.111306
0.392665	NM_153045	C9orf91	chromosome 9 open reading frame 91	0.11381
0.394174	NM_001085375	C1orf226	chromosome 1 open reading frame 226	0.118216
0.39538	NM_001201335	GCFC2	GC-rich sequence DNA-binding factor 2	0.114061
0.396859	lnc-RWDD3-6:1	lnc-RWDD3-6	lnc-RWDD3-6:1	0.137453
0.397376	NM_199357	ARHGAP11A	Rho GTPase activating protein 11A	0.11757
0.397516	ENST00000592540	SPC24	SPC24, NDC80 kinetochore complex component	0.112113
0.398854	NM_013943	CLIC4	chloride intracellular channel 4	0.112358
0.399226	NM_145287	ZNF519	zinc finger protein 519	0.113197
0.399994	NM_139071	SMARCD1	SWI/SNF related, matrix associated, actin dependent regulator of chromatin, subfamily d, member 1	0.112697
0.400346	NM_001198908	CCDC169	coiled-coil domain containing 169	0.156609
0.401214	NM_032227	TMEM164	transmembrane protein 164	0.122046
0.401551	ENST00000506386			0.133708
0.402683	NM_017412	FZD3	frizzled class receptor 3	0.13216
0.402835	NM_005263	GFI1	growth factor independent 1 transcription repressor	0.139387
0.403546	ENST00000521373			0.164742
0.404315	NM_006509	RELB	v-rel avian reticuloendotheliosis viral oncogene homolog B	0.113497
0.404583	TCONS_l2_00018071	XLOC_l2_009571		0.166834
0.405041	NM_001290050	UHRF1	ubiquitin-like with PHD and ring finger domains 1	0.119641
0.405758	NM_139239	NFKBID	nuclear factor of kappa light polypeptide gene enhancer in B-cells inhibitor, delta	0.151456
0.405832	ENST00000511103			0.113876
0.406335	NM_014247	RAPGEF2	Rap guanine nucleotide exchange factor (GEF) 2	0.150558
0.408332	ENST00000578967			0.14882
0.409734	NM_024334	TMEM43	transmembrane protein 43	4.54509e-07
0.409852	NR_003584	SNHG8	small nucleolar RNA host gene 8 (non-protein coding)	0.114756
0.41071	NR_033856	FLJ43315	asparagine synthetase pseudogene	0.126012
0.410938	NR_002995	SNORA76C	small nucleolar RNA, H/ACA box 76C	0.116307
0.411717	NR_125749	TBX2-AS1	TBX2 antisense RNA 1	0.115262
0.412081	NM_145814	CACNG6	calcium channel, voltage-dependent, gamma subunit 6	0.115727
0.412883	NM_014738	KIAA0195	KIAA0195	0.122379
0.41312	NM_145232	CTU1	cytosolic thiouridylase subunit 1	0.148421
0.413796	NM_018660	ZNF395	zinc finger protein 395	0.115784
0.414573	NM_181709	FAM101A	family with sequence similarity 101, member A	0.133649
0.415211	NR_027046	LOC145474	uncharacterized LOC145474	0.136351
0.415784	NR_120611	NUTM2B-AS1	NUTM2B antisense RNA 1	0.120479
0.416557	NR_126417	FOXP4-AS1	FOXP4 antisense RNA 1	0.120254
0.417112	NM_018718	CEP41	centrosomal protein 41kDa	0.126276
0.419329	NM_021067	GINS1	GINS complex subunit 1 (Psf1 homolog)	0.117109
0.420718	ENST00000585065			0.117314
0.422013	NM_020792	NCEH1	neutral cholesterol ester hydrolase 1	0.117655
0.422963	NM_001080496	RGP1	RGP1 retrograde golgi transport homolog (S. cerevisiae)	0.162964
0.42301	NR_125749	TBX2-AS1	TBX2 antisense RNA 1	0.117982
0.423232	NM_014252	SLC25A15	solute carrier family 25 (mitochondrial carrier; ornithine transporter) member 15	0.146225
0.424275	NM_005184	CALM3	calmodulin 3 (phosphorylase kinase, delta)	0.118245
0.424351	NM_174898	LYG1	lysozyme G-like 1	0.172366
0.424906	NM_001242690	ERVMER34-1	endogenous retrovirus group MER34, member 1	0.122945
0.426007	NM_004375	COX11	COX11 cytochrome c oxidase copper chaperone	0.124803
0.426414	AK131474	LOC440082	uncharacterized LOC440082	0.146344
0.427785	NM_001031748	C12orf40	chromosome 12 open reading frame 40	0.1787
0.427906	NM_001839	CNN3	calponin 3, acidic	0.119255
0.427979	NM_020365	EIF2B3	eukaryotic translation initiation factor 2B, subunit 3 gamma, 58kDa	0.120715
0.428331	NM_198253	TERT	telomerase reverse transcriptase	6.80731e-08
0.429205	NM_020904	PLEKHA4	pleckstrin homology domain containing, family A (phosphoinositide binding specific) member 4	0.157457
0.42922	NM_014737	RASSF2	Ras association (RalGDS/AF-6) domain family member 2	0.121565
0.429868	NM_152775	CCDC110	coiled-coil domain containing 110	0.154398
0.430916	NM_024323	C19orf57	chromosome 19 open reading frame 57	0.12162
0.430965	NM_002505	NFYA	nuclear transcription factor Y, alpha	0.145444
0.431174	NM_012140	SLC25A10	solute carrier family 25 (mitochondrial carrier; dicarboxylate transporter), member 10	0.129047
0.431726	NM_001164479	C5orf63	chromosome 5 open reading frame 63	0.120001
0.43392	THC2659602			0.162432
0.434321	NM_001039569	AP1S3	adaptor-related protein complex 1, sigma 3 subunit	0.126295
0.434979	NM_153697	ANKRD44	ankyrin repeat domain 44	0.187526
0.435759	NM_020394	ZNF695	zinc finger protein 695	0.128059
0.435891	NM_015483	KBTBD2	kelch repeat and BTB (POZ) domain containing 2	0.123234
0.436148	lnc-ANGPTL2-2:3	lnc-ANGPTL2-2	lnc-ANGPTL2-2:3	0.150788
0.436236	NM_014285	EXOSC2	exosome component 2	0.123515
0.436619	NM_025218	ULBP1	UL16 binding protein 1	0.125306
0.436707	NM_001204255	SCARB2	scavenger receptor class B, member 2	0.121271
0.437202	NR_120577	LOC101929340	uncharacterized LOC101929340	0.145589
0.43769	NM_017769	G2E3	G2/M-phase specific E3 ubiquitin protein ligase	0.16616
0.43771	NM_001161779	PDP1	pyruvate dehyrogenase phosphatase catalytic subunit 1	0.12155
0.43946	ENST00000402116	EIF3D	eukaryotic translation initiation factor 3, subunit D	0.157552
0.440717	NM_004870	MPDU1	mannose-P-dolichol utilization defect 1	0.124522
0.441053	ENST00000585065			0.122374
0.4412	NM_005375	MYB	v-myb avian myeloblastosis viral oncogene homolog	0.124625
0.442223	NM_001195228	FAM64A	family with sequence similarity 64, member A	0.169156
0.443213	lnc-SERPINC1-1:24	lnc-SERPINC1-1	lnc-SERPINC1-1:24	0.123403
0.443251	NM_032883	TOX2	TOX high mobility group box family member 2	0.123252
0.443454	lnc-FAM43A-2:1	lnc-FAM43A-2	lnc-FAM43A-2:1	0.154337
0.444597	NR_125885	LOC101927359	uncharacterized LOC101927359	0.158207
0.445034	NM_020859	SHROOM3	shroom family member 3	0.186496
0.445096	ENST00000433260			0.15995
0.445704	NM_005497	GJC1	gap junction protein, gamma 1, 45kDa	0.123586
0.445761	NM_022045	MTBP	MDM2 binding protein	0.159486
0.445836	NR_103738	SOX9-AS1	SOX9 antisense RNA 1	0.127693
0.445966	lnc-OR1F1-1:1	lnc-OR1F1-1	lnc-OR1F1-1:1	0.149601
0.446139	NM_058179	PSAT1	phosphoserine aminotransferase 1	0.123703
0.447298	NR_033910	TFAP2A-AS1	TFAP2A antisense RNA 1	0.192539
0.44837	NM_030919	FAM83D	family with sequence similarity 83, member D	0.124415
0.449205	ENST00000433816			0.188837
0.449505	NR_024031	DANCR	differentiation antagonizing non-protein coding RNA	0.125188
0.449649	NM_001003679	LEPR	leptin receptor	0.161332
0.450321	NM_001039569	AP1S3	adaptor-related protein complex 1, sigma 3 subunit	0.177368
0.452397	NM_001122607	RUNX1	runt-related transcription factor 1	0.168774
0.452746	NM_001114120	DEPDC1	DEP domain containing 1	0.164498
0.453297	NM_005819	STX6	syntaxin 6	0.128712
0.453704	lnc-UNC93B1-2:1	lnc-UNC93B1-2	lnc-UNC93B1-2:1	0.139578
0.454136	NM_001039590	USP9X	ubiquitin specific peptidase 9, X-linked	0.132336
0.455294	ENST00000396049			0.129124
0.45651	NM_015350	LRRC8B	leucine rich repeat containing 8 family, member B	0.129858
0.456546	NM_033406	FBXO3	F-box protein 3	0.13388
0.457136	NR_027258	PRORSD1P	prolyl-tRNA synthetase associated domain containing 1, pseudogene	0.144027
0.457956	NM_001116	ADCY9	adenylate cyclase 9	0.128968
0.459355	NM_004779	CNOT8	CCR4-NOT transcription complex, subunit 8	0.128703
0.459592	THC2757892			0.135454
0.460108	NM_005228	EGFR	epidermal growth factor receptor	0.128091
0.46112	NM_000124	ERCC6	excision repair cross-complementation group 6	0.141552
0.461664	NM_004830	MED23	mediator complex subunit 23	0.13063
0.462126	NM_000693	ALDH1A3	aldehyde dehydrogenase 1 family, member A3	0.134612
0.462169	NR_105019	TMEM161B-AS1	TMEM161B antisense RNA 1	0.129509
0.462385	NM_133367	PAQR8	progestin and adipoQ receptor family member VIII	0.171857
0.464029	ENST00000449819	LOC100506797	uncharacterized LOC100506797	0.133387
0.464362	NM_003009	SEPW1	selenoprotein W, 1	0.128665
0.464378	NM_023079	UBE2Z	ubiquitin-conjugating enzyme E2Z	0.139789
0.464878	lnc-DFFB-3:1	lnc-DFFB-3	lnc-DFFB-3:1	0.170318
0.466121	NM_015470	RAB11FIP5	RAB11 family interacting protein 5 (class I)	0.129295
0.466272	NM_015983	UBE2D4	ubiquitin-conjugating enzyme E2D 4 (putative)	0.129426
0.466626	THC2616237			0.169269
0.467096	NR_026775	LINC00240	long intergenic non-protein coding RNA 240	0.199075
0.467314	NM_001145369	PTPN3	protein tyrosine phosphatase, non-receptor type 3	0.13821
0.467354	NM_002538	OCLN	occludin	0.200938
0.467898	NM_014783	ARHGAP11A	Rho GTPase activating protein 11A	0.170399
0.468998	NM_017688	BSPRY	B-box and SPRY domain containing	0.134947
0.469269	NM_006913	RNF5	ring finger protein 5, E3 ubiquitin protein ligase	0.130105
0.469551	NM_014969	WDR47	WD repeat domain 47	0.19431
0.469689	NM_016270	KLF2	Kruppel-like factor 2	0.130213
0.469946	NM_014736	KIAA0101	KIAA0101	3.18843e-08
0.47012	ENST00000454475			0.130353
0.470481	NM_173529	C18orf54	chromosome 18 open reading frame 54	0.132972
0.470531	lnc-MFSD6-1:1	lnc-MFSD6-1	lnc-MFSD6-1:1	0.130892
0.470748	NM_032804	ADO	2-aminoethanethiol (cysteamine) dioxygenase	0.136884
0.470853	NM_144570	HN1L	hematological and neurological expressed 1-like	0.151632
0.470921	NR_105019	TMEM161B-AS1	TMEM161B antisense RNA 1	0.131594
0.471304	NM_019058	DDIT4	DNA-damage-inducible transcript 4	3.94717e-08
0.471941	NR_037169	LOC100507547	uncharacterized LOC100507547	0.131785
0.472328	NM_014252	SLC25A15	solute carrier family 25 (mitochondrial carrier; ornithine transporter) member 15	0.143122
0.472972	lnc-EVX1-5:3	lnc-EVX1-5	lnc-EVX1-5:3	0.196633
0.473035	BC016059	F2R	coagulation factor II (thrombin) receptor	0.144591
0.473055	NM_013282	UHRF1	ubiquitin-like with PHD and ring finger domains 1	0.131764
0.473185	NM_002421	MMP1	matrix metallopeptidase 1 (interstitial collagenase)	4.1675e-06
0.473341	NM_032636	PSRC1	proline/serine-rich coiled-coil 1	0.131587
0.47341	NM_002777	PRTN3	proteinase 3	0.182864
0.473441	NM_012145	DTYMK	deoxythymidylate kinase (thymidylate kinase)	0.131276
0.473857	ENST00000337787	SMG1P1	SMG1 pseudogene 1	0.146007
0.474464	NM_021960	MCL1	myeloid cell leukemia 1	0.131786
0.476138				0.132136
0.476227	NM_001012716	TYMSOS	TYMS opposite strand	0.134037
0.476777	NR_004422	HPVC1	human papillomavirus (type 18) E5 central sequence-like 1	0.184711
0.476931	NM_033219	TRIM14	tripartite motif containing 14	0.201539
0.477168	NM_005923	MAP3K5	mitogen-activated protein kinase kinase kinase 5	0.159328
0.477208	NM_002695	POLR2E	polymerase (RNA) II (DNA directed) polypeptide E, 25kDa	0.161171
0.477213	NM_005573	LMNB1	lamin B1	0.133407
0.47788	NR_125979	LOC101929516	uncharacterized LOC101929516	0.144877
0.4782	NM_001128854	SRRT	serrate, RNA effector molecule	0.15627
0.479163	ENST00000395181			0.13301
0.479286	XR_242910	LOC101928054	uncharacterized LOC101928054	0.155077
0.479425	ENST00000427083			0.133061
0.479461	NR_110708	LINC01534	long intergenic non-protein coding RNA 1534	0.1601
0.479638	NM_201380	PLEC	plectin	0.133211
0.479661	NM_012104	BACE1	beta-site APP-cleaving enzyme 1	0.134406
0.479855	NM_001008392	CTDSPL	CTD (carboxy-terminal domain, RNA polymerase II, polypeptide A) small phosphatase-like	0.135174
0.480024	NM_145064	STAC3	SH3 and cysteine rich domain 3	0.160604
0.480304	NM_020718	USP31	ubiquitin specific peptidase 31	0.157009
0.48067	NM_006306	SMC1A	structural maintenance of chromosomes 1A	0.137267
0.480838	NM_017824	43954	membrane-associated ring finger (C3HC4) 5	0.204622
0.481027	NM_005322	HIST1H1B	histone cluster 1, H1b	0.133983
0.481144	XR_108348	LOC100507670	uncharacterized LOC100507670	0.185303
0.481565	NM_015215	CAMTA1	calmodulin binding transcription activator 1	0.195201
0.481623	NM_014897	ZNF652	zinc finger protein 652	0.135074
0.481716	NM_001281932	NCAPG2	non-SMC condensin II complex, subunit G2	0.135612
0.481845	NR_045375	LOC100506124	uncharacterized LOC100506124	0.194331
0.482014	NM_001001995	GPM6B	glycoprotein M6B	0.161877
0.482314	NM_001009899	KIAA2018	KIAA2018	0.170465
0.482674	NM_031450	C11orf68	chromosome 11 open reading frame 68	0.134148
0.482922	NR_024497	LINC00999	long intergenic non-protein coding RNA 999	0.190452
0.483627	XR_109592	LOC100505771	uncharacterized LOC100505771	0.134986
0.483857	NR_038926	PRKAG2-AS1	PRKAG2 antisense RNA 1	0.1494
0.483915	lnc-RASA1-3:20	lnc-RASA1-3	lnc-RASA1-3:20	0.157904
0.484232	ENST00000380496	HAUS6	HAUS augmin-like complex, subunit 6	0.178776
0.484504	NM_001008390	CGGBP1	CGG triplet repeat binding protein 1	0.137604
0.484518	XR_426812	LOC101928979	uncharacterized LOC101928979	0.203525
0.484621	NM_181578	RFC5	replication factor C (activator 1) 5, 36.5kDa	0.13466
0.485045	NM_032637	SKP2	S-phase kinase-associated protein 2, E3 ubiquitin protein ligase	0.1464
0.485259	NM_006827	TMED10	transmembrane emp24-like trafficking protein 10 (yeast)	0.13481
0.48526	NM_032714	INF2	inverted formin, FH2 and WH2 domain containing	0.135809
0.485602	ENST00000563192	SNHG19	small nucleolar RNA host gene 19 (non-protein coding)	0.134922
0.485749	NM_012121	CDC42EP4	CDC42 effector protein (Rho GTPase binding) 4	0.138007
0.486244	NM_022769	CRTC3	CREB regulated transcription coactivator 3	0.141797
0.486571	NM_001164234	DDHD2	DDHD domain containing 2	0.1815
0.486813	NR_036539	LOC644656	uncharacterized LOC644656	0.137453
0.487023	NR_038357	ZSWIM8-AS1	ZSWIM8 antisense RNA 1	0.14866
0.489203	NM_198181	GOLGA6L9	golgin A6 family-like 9	0.147336
0.489814	NM_001029860	FBXO43	F-box protein 43	0.167091
0.489882	ENST00000444871	LOC100130502	uncharacterized LOC100130502	0.162648
0.490449	NM_006361	HOXB13	homeobox B13	0.139711
0.490712	NM_004695	SLC16A5	solute carrier family 16 (monocarboxylate transporter), member 5	0.136564
0.490771	ENST00000599859			0.136875
0.491079	NM_006845	KIF2C	kinesin family member 2C	0.136612
0.491172	NM_030928	CDT1	chromatin licensing and DNA replication factor 1	0.13665
0.491395	NM_001024630	RUNX2	runt-related transcription factor 2	0.145488
0.492292	ENST00000418309			0.188565
0.492294	NM_031905	ARMC10	armadillo repeat containing 10	0.137056
0.492374	NM_002392	MDM2	MDM2 proto-oncogene, E3 ubiquitin protein ligase	0.146783
0.492509	NR_026885	LOC100270804	uncharacterized LOC100270804	0.165568
0.492637	NM_032160	DSEL	dermatan sulfate epimerase-like	0.153298
0.493842	XR_427741	LOC101929687	uncharacterized LOC101929687	0.144085
0.494151	NM_006315	PCGF3	polycomb group ring finger 3	0.205815
0.494183	NM_007275	TUSC2	tumor suppressor candidate 2	0.13762
0.494577	ENST00000439811			0.137719
0.494633	BC005372	MGC12488	uncharacterized protein MGC12488	0.196509
0.494698	NM_005483	CHAF1A	chromatin assembly factor 1, subunit A (p150)	0.170395
0.494761	NM_021097	SLC8A1	solute carrier family 8 (sodium/calcium exchanger), member 1	0.213367
0.495393	NM_020937	FANCM	Fanconi anemia, complementation group M	0.139737
0.495724	NM_001007072	ZSCAN2	zinc finger and SCAN domain containing 2	0.224511
0.495785				0.139684
0.495789	NM_024888	LPPR3	lipid phosphate phosphatase-related protein type 3	0.14884
0.496716	NM_002223	ITPR2	inositol 1,4,5-trisphosphate receptor, type 2	0.173624
0.496883	NM_014521	SH3BP4	SH3-domain binding protein 4	0.171037
0.49691	NM_001761	CCNF	cyclin F	0.227661
0.497139	NM_017996	DET1	de-etiolated homolog 1 (Arabidopsis)	0.15313
0.497271	lnc-STX8-2:1	lnc-STX8-2	lnc-STX8-2:1	0.204395
0.497281	NM_020226	PRDM8	PR domain containing 8	0.213348
0.497286	NR_003045	SNORD17	small nucleolar RNA, C/D box 17	0.158993
0.497331	NM_001136137	RPL28	ribosomal protein L28	0.168948
0.497769	NR_105019	TMEM161B-AS1	TMEM161B antisense RNA 1	0.144664
0.497834	lnc-OR4M2-7:1	lnc-OR4M2-7	lnc-OR4M2-7:1	0.158169
0.497981	NM_002945	RPA1	replication protein A1, 70kDa	0.138808
0.498526				0.166202
0.499352	NM_014667	VGLL4	vestigial-like family member 4	0.140585
0.49942	NM_001277335	RASA4B	RAS p21 protein activator 4B	0.254305
0.499493	NM_001175	ARHGDIB	Rho GDP dissociation inhibitor (GDI) beta	0.163956
0.499516	NM_004705	PRKRIR	protein-kinase, interferon-inducible double stranded RNA dependent inhibitor, repressor of (P58 repressor)	0.14756
0.499583	NM_001193552	ZNF850	zinc finger protein 850	0.14568
0.499721	AK093004	LOC286272	uncharacterized LOC286272	0.165128
0.499831	NM_007121	NR1H2	nuclear receptor subfamily 1, group H, member 2	0.161599
2.00266	NM_001007245	IFRD1	interferon-related developmental regulator 1	0.139215
2.00368	ENST00000608606			0.19696
2.00388	NR_126008	LOC440390	uncharacterized LOC440390	0.139174
2.01048	NM_177938	P4HTM	prolyl 4-hydroxylase, transmembrane (endoplasmic reticulum)	0.145241
2.01075	NM_006500	MCAM	melanoma cell adhesion molecule	0.144095
2.01419	NM_004994	MMP9	matrix metallopeptidase 9 (gelatinase B, 92kDa gelatinase, 92kDa type IV collagenase)	0.138213
2.01467	NR_026794	LINC00202-2	long intergenic non-protein coding RNA 202-2	0.142212
2.0161	NM_001024071	GCH1	GTP cyclohydrolase 1	0.15465
2.01644	TCONS_l2_00009861	XLOC_l2_005314		0.138428
2.01659	NM_001080209	TMEM200C	transmembrane protein 200C	0.19564
2.01828	NM_002087	GRN	granulin	0.137885
2.02039	NM_001845	COL4A1	collagen, type IV, alpha 1	0.193381
2.0209	NM_000076	CDKN1C	cyclin-dependent kinase inhibitor 1C (p57, Kip2)	0.1377
2.02255	TCONS_l2_00012419	XLOC_l2_006665		0.138509
2.02353	NM_194247	HNRNPA3	heterogeneous nuclear ribonucleoprotein A3	0.137477
2.02358	NM_012257	HBP1	HMG-box transcription factor 1	0.138803
2.02557	ENST00000462937	AADACP1	arylacetamide deacetylase pseudogene 1	0.156925
2.02789	NM_012171	TSPAN17	tetraspanin 17	0.137705
2.02999	NM_003546	HIST1H4L	histone cluster 1, H4l	0.138181
2.03079	NM_001031732	YTHDC1	YTH domain containing 1	0.176148
2.03109	ENST00000556652			0.137016
2.03293	NM_144727	CRYGN	crystallin, gamma N	0.202854
2.03509				0.136608
2.03513	NM_001145031	PLAU	plasminogen activator, urokinase	0.136712
2.03599	NM_001017981	RNF215	ring finger protein 215	0.163074
2.03687	NM_001001890	RUNX1	runt-related transcription factor 1	0.177893
2.03789	NM_145047	OSCP1	organic solute carrier partner 1	0.194597
2.03875	NM_022726	ELOVL4	ELOVL fatty acid elongase 4	0.144105
2.0392	NM_018423	STYK1	serine/threonine/tyrosine kinase 1	0.15048
2.03964	ENST00000609777			0.136524
2.04124	NM_001747	CAPG	capping protein (actin filament), gelsolin-like	0.136132
2.04316	NM_001137560	TMEM151B	transmembrane protein 151B	0.138332
2.04371	NM_207102	FBXW12	F-box and WD repeat domain containing 12	0.14125
2.04463	NM_152763	AKNAD1	AKNA domain containing 1	0.195779
2.04888	lnc-GTDC1-6:1	lnc-GTDC1-6	lnc-GTDC1-6:1	0.135707
2.04922	NM_018712	ELMOD1	ELMO/CED-12 domain containing 1	0.139773
2.04958	NM_001242369	CACFD1	calcium channel flower domain containing 1	0.13575
2.04973	NM_138415	PHF21B	PHD finger protein 21B	0.136095
2.05073	ENST00000521016			0.146835
2.05129	NM_182616	ARPIN	actin-related protein 2/3 complex inhibitor	0.18469
2.05196	NM_175055	HIST3H2BB	histone cluster 3, H2bb	0.141958
2.05396	DA380124			0.158721
2.05548	NM_001033045	GPR155	G protein-coupled receptor 155	0.144721
2.05739	NM_000657	BCL2	B-cell CLL/lymphoma 2	0.161268
2.05765	AK127786			0.187874
2.06346	NR_125785	LINC01038	long intergenic non-protein coding RNA 1038	0.172584
2.06352	ENST00000391621	KRTAP10-2	keratin associated protein 10-2	0.15652
2.06529	NM_032780	TMEM25	transmembrane protein 25	0.134661
2.06625	TCONS_l2_00001843	XLOC_l2_001362		0.13441
2.06673	NM_030753	WNT3	wingless-type MMTV integration site family, member 3	0.137067
2.06686	NM_020180	CELF4	CUGBP, Elav-like family member 4	0.137093
2.0676	ENST00000433548			0.134267
2.06763	ENST00000507759			0.185991
2.06835	ENST00000525280			0.134179
2.06938	NM_178232	HAPLN3	hyaluronan and proteoglycan link protein 3	0.134959
2.07064	NM_173828	RELL2	RELT-like 2	0.134068
2.07301	NM_001024209	SPRR2E	small proline-rich protein 2E	0.134474
2.07383	ENST00000611915			0.142195
2.07416	lnc-DET1-1:2	lnc-DET1-1	lnc-DET1-1:2	0.135079
2.07633	TCONS_l2_00025962	XLOC_l2_013458		0.190122
2.07732	NM_000500	CYP21A2	cytochrome P450, family 21, subfamily A, polypeptide 2	0.151415
2.08267	NM_000899	KITLG	KIT ligand	0.134166
2.086	lnc-FAM84B-8:2	lnc-FAM84B-8	lnc-FAM84B-8:2	0.147757
2.08619	ENST00000415536	LOC102723946	uncharacterized LOC102723946	0.133171
2.08768	NM_002152	HRC	histidine rich calcium binding protein	0.142599
2.08893	NM_022147	RTP4	receptor (chemosensory) transporter protein 4	0.22297
2.08978	NM_002133	HMOX1	heme oxygenase (decycling) 1	4.48657e-08
2.09082	NM_001012967	DDX60L	DEAD (Asp-Glu-Ala-Asp) box polypeptide 60-like	0.155824
2.09213	NM_001293070	CHN2	chimerin 2	0.146498
2.09273	NM_001284407	TMEM40	transmembrane protein 40	0.172766
2.09549	NM_052819	CARD14	caspase recruitment domain family, member 14	0.13295
2.09661	NM_031303	KATNAL2	katanin p60 subunit A-like 2	0.143313
2.09682	NM_001009185	ACSL6	acyl-CoA synthetase long-chain family member 6	0.180917
2.09751	NM_001014450	SPRR2F	small proline-rich protein 2F	0.132539
2.09807	NM_005293	GPR20	G protein-coupled receptor 20	0.149729
2.09999	NM_005876	SPEG	SPEG complex locus	0.131998
2.10105	lnc-CYS1-2:2	lnc-CYS1-2	lnc-CYS1-2:2	0.172578
2.10117	lnc-NDUFA4-1:1	lnc-NDUFA4-1	lnc-NDUFA4-1:1	0.145549
2.10326	NM_003641	IFITM1	interferon induced transmembrane protein 1	0.146156
2.10523	NM_004621	TRPC6	transient receptor potential cation channel, subfamily C, member 6	0.131745
2.10539	NM_016594	FKBP11	FK506 binding protein 11, 19 kDa	0.131636
2.10642	NM_001032731	OAS2	2'-5'-oligoadenylate synthetase 2, 69/71kDa	0.140407
2.10881	NM_001076682	NCAM1	neural cell adhesion molecule 1	0.165113
2.10913	NM_005576	LOXL1	lysyl oxidase-like 1	0.131367
2.10949	TCONS_l2_00025628	XLOC_l2_013267		0.1797
2.10985	NM_001851	COL9A1	collagen, type IX, alpha 1	0.157705
2.11125	NM_001014796	DDR2	discoidin domain receptor tyrosine kinase 2	0.132823
2.11221	XR_432412	LOC102725053	unconventional myosin-Vb-like	0.15308
2.11363	NM_001244808	FOXP1	forkhead box P1	0.131081
2.1144	XR_426298	LOC101929622	uncharacterized LOC101929622	0.131022
2.11489	NM_001164469	TMED7-TICAM2	TMED7-TICAM2 readthrough	0.13165
2.11638	NM_015984	UCHL5	ubiquitin carboxyl-terminal hydrolase L5	3.60888e-08
2.11872	NM_032728	PPAPDC3	phosphatidic acid phosphatase type 2 domain containing 3	0.141482
2.12397	NM_018263	ASXL2	additional sex combs like transcriptional regulator 2	0.148635
2.12475				0.136515
2.12583	NM_001012974	LRRC73	leucine rich repeat containing 73	0.130916
2.12611	ENST00000411785			0.162617
2.12726	ENST00000418066	ANXA4	annexin A4	0.131405
2.1301	NM_005144	HR	hair growth associated	0.135358
2.13039	ENST00000407418	CBX6	chromobox homolog 6	0.129992
2.13251	NM_015693	INTU	inturned planar cell polarity protein	0.176003
2.1329	ENST00000529785			0.190794
2.13372	NM_006334	OLFM1	olfactomedin 1	0.180816
2.13427	NM_001130924	TMEM201	transmembrane protein 201	0.129807
2.13766	ENST00000419448	ATP11A	ATPase, class VI, type 11A	0.141492
2.1377	NM_001172660	ZFYVE28	zinc finger, FYVE domain containing 28	0.136838
2.13866	NM_001901	CTGF	connective tissue growth factor	0.129692
2.14211	NM_005269	GLI1	GLI family zinc finger 1	0.131013
2.14811	NM_005561	LAMP1	lysosomal-associated membrane protein 1	0.128884
2.14965	NM_015331	NCSTN	nicastrin	0.128794
2.15262	lnc-PTEN-1:1	lnc-PTEN-1	lnc-PTEN-1:1	0.185261
2.15265	lnc-RNF186-1:1	lnc-RNF186-1	lnc-RNF186-1:1	0.129008
2.15354	NM_025057	CCDC176	coiled-coil domain containing 176	0.171751
2.15586	ENST00000390319			0.133904
2.15851	NM_001260492	RDX	radixin	0.130592
2.15979	NM_001012503	KRTAP5-7	keratin associated protein 5-7	0.137001
2.15979	NM_033201	C16orf45	chromosome 16 open reading frame 45	0.128849
2.16111				0.182424
2.16483	NM_004522	KIF5C	kinesin family member 5C	0.128074
2.16662	ENST00000426330			0.127767
2.17541	NM_012476	VAX2	ventral anterior homeobox 2	0.153899
2.17587	ENST00000556762			0.130164
2.17598	NM_003633	ENC1	ectodermal-neural cortex 1 (with BTB domain)	0.151483
2.17754	NM_005715	UST	uronyl-2-sulfotransferase	0.137128
2.1785	NM_005202	COL8A2	collagen, type VIII, alpha 2	0.165775
2.18326	ENST00000436530			0.224239
2.18363	NM_003741	CHRD	chordin	0.135821
2.1837	NM_182526	TMEM229B	transmembrane protein 229B	0.127076
2.18841	NM_002314	LIMK1	LIM domain kinase 1	0.126531
2.18963	NM_018684	ZC4H2	zinc finger, C4H2 domain containing	0.126522
2.19005	NM_019071	ING3	inhibitor of growth family, member 3	3.17301e-08
2.19512	TCONS_l2_00023265	XLOC_l2_012323		0.163582
2.20274	NM_002480	PPP1R12A	protein phosphatase 1, regulatory subunit 12A	0.126001
2.20542	NM_207426	FOXI2	forkhead box I2	0.125535
2.21004	NM_016623	FAM49B	family with sequence similarity 49, member B	0.125288
2.21584	NM_002084	GPX3	glutathione peroxidase 3 (plasma)	0.170642
2.21961	NM_001242607	NCAM1	neural cell adhesion molecule 1	0.124775
2.2202	NM_002625	PFKFB1	6-phosphofructo-2-kinase/fructose-2,6-biphosphatase 1	0.141637
2.22519	NR_033972	LOC440028	uncharacterized LOC440028	0.175802
2.22631	lnc-DDX31-1:1	lnc-DDX31-1	lnc-DDX31-1:1	0.133727
2.22973	lnc-SLC4A3-3:1	lnc-SLC4A3-3	lnc-SLC4A3-3:1	0.132202
2.23241	NM_032269	DRC7	dynein regulatory complex subunit 7	0.177178
2.23623	NM_012109	TMEM59L	transmembrane protein 59-like	0.127737
2.23782	NM_181688	KRTAP10-10	keratin associated protein 10-10	0.124402
2.23814	NM_018696	ELAC1	elaC ribonuclease Z 1	0.144356
2.23886	NM_001195	BFSP1	beaded filament structural protein 1, filensin	0.123781
2.2402	NM_152479	TTC9B	tetratricopeptide repeat domain 9B	0.124374
2.24254	NM_030981	RAB1B	RAB1B, member RAS oncogene family	0.123535
2.24854	ENST00000453454	LOC220729	succinate dehydrogenase complex, subunit A, flavoprotein (Fp) pseudogene	0.125915
2.24903	NM_138789	PIH1D2	PIH1 domain containing 2	0.135389
2.25963	lnc-STOX2-1:1	lnc-STOX2-1	lnc-STOX2-1:1	0.137474
2.26083	lnc-FOXG1-6:15	lnc-FOXG1-6	lnc-FOXG1-6:15	0.170028
2.26247	NM_002526	NT5E	5'-nucleotidase, ecto (CD73)	0.122515
2.26367	NM_024815	NUDT18	nudix (nucleoside diphosphate linked moiety X)-type motif 18	0.151572
2.26374	NM_182796	MAT2B	methionine adenosyltransferase II, beta	0.159704
2.26582	NM_178570	RTN4RL2	reticulon 4 receptor-like 2	0.132505
2.26679	NR_040089	ALOX12-AS1	ALOX12 antisense RNA 1	0.132555
2.26807	NM_005318	H1F0	H1 histone family, member 0	0.122809
2.27202	NM_002166	ID2	inhibitor of DNA binding 2, dominant negative helix-loop-helix protein	0.133849
2.27347	NM_015475	FAM98A	family with sequence similarity 98, member A	0.122899
2.27565	BC130650	LOC100287160	uncharacterized LOC100287160	0.123139
2.27682	lnc-OCM-1:2	lnc-OCM-1	lnc-OCM-1:2	0.123166
2.27705	NM_003846	PEX11B	peroxisomal biogenesis factor 11 beta	0.122116
2.27769	lnc-ADAMTS18-1:1	lnc-ADAMTS18-1	lnc-ADAMTS18-1:1	0.15132
2.28199	lnc-H2AFV-1:1	lnc-H2AFV-1	lnc-H2AFV-1:1	0.17099
2.28606				0.122885
2.28765	NR_047499	LINC00570	long intergenic non-protein coding RNA 570	0.156184
2.29046	NM_001008495	TMEM64	transmembrane protein 64	0.137331
2.29521	NM_001172684	CELF6	CUGBP, Elav-like family member 6	0.120896
2.29911	NM_181643	PIFO	primary cilia formation	0.250159
2.30257	NM_001288819	CPEB1	cytoplasmic polyadenylation element binding protein 1	0.120733
2.30397	ENST00000525757	LOC102724910	uncharacterized LOC102724910	0.12104
2.31071	NM_015050	CMTR1	cap methyltransferase 1	0.181973
2.31162	NM_018177	N4BP2	NEDD4 binding protein 2	0.222392
2.31544	NM_000197	HSD17B3	hydroxysteroid (17-beta) dehydrogenase 3	0.166151
2.31554	XR_112442	LOC729770	uncharacterized LOC729770	0.121618
2.31747				0.119842
2.31768	lnc-PLEKHH2-2:1	lnc-PLEKHH2-2	lnc-PLEKHH2-2:1	0.121121
2.31866	NM_199001	CYSRT1	cysteine-rich tail protein 1	0.13127
2.31929	NM_022648	TNS1	tensin 1	0.128169
2.322	NM_001145112	PATL2	protein associated with topoisomerase II homolog 2 (yeast)	0.128368
2.3224	NM_022910	NDRG4	NDRG family member 4	0.120441
2.32457	NM_004101	F2RL2	coagulation factor II (thrombin) receptor-like 2	0.123829
2.32751	NM_002515	NOVA1	neuro-oncological ventral antigen 1	0.120313
2.33123	NM_173728	ARHGEF15	Rho guanine nucleotide exchange factor (GEF) 15	0.12008
2.33726	NM_199001	CYSRT1	cysteine-rich tail protein 1	0.139815
2.34212	NM_000104	CYP1B1	cytochrome P450, family 1, subfamily B, polypeptide 1	0.165245
2.35117	NM_001136493	MFSD2A	major facilitator superfamily domain containing 2A	0.125338
2.35747	AK123450	LOC645195	uncharacterized LOC645195	0.163147
2.35864	TCONS_l2_00011050	XLOC_l2_005952		0.118025
2.35955	NM_004010	DMD	dystrophin	0.122388
2.36327	NM_207014	WDR78	WD repeat domain 78	0.156565
2.3688	ENST00000299413	TRIM44	tripartite motif containing 44	0.118158
2.37216	NM_002658	PLAU	plasminogen activator, urokinase	0.117405
2.37252	NM_003105	SORL1	sortilin-related receptor, L(DLR class) A repeats containing	0.117407
2.37288	lnc-ETV3-2:2	lnc-ETV3-2	lnc-ETV3-2:2	0.119345
2.37313	ENST00000373544	RABEPK	Rab9 effector protein with kelch motifs	0.117536
2.37465				0.117361
2.37519	NM_001286790	CNOT6L	CCR4-NOT transcription complex, subunit 6-like	0.117429
2.37969	NM_153702	ELMOD2	ELMO/CED-12 domain containing 2	0.138441
2.38085	NR_033870	TEX41	testis expressed 41 (non-protein coding)	0.117037
2.38748	NM_014895	CEP162	centrosomal protein 162kDa	0.153189
2.39026				0.119634
2.39448	NM_182796	MAT2B	methionine adenosyltransferase II, beta	0.116821
2.39486	lnc-SEZ6L2-1:1	lnc-SEZ6L2-1	lnc-SEZ6L2-1:1	0.116532
2.39797	NM_001034850	FAM134B	family with sequence similarity 134, member B	0.123681
2.39934	ENST00000509671			0.148127
2.40138				0.116248
2.40196	NM_024687	ZBBX	zinc finger, B-box domain containing	0.155613
2.41279	TCONS_l2_00017563	XLOC_l2_009285		0.150592
2.4146	NM_020437	ASPHD2	aspartate beta-hydroxylase domain containing 2	0.129022
2.4148	NR_038993	ZBTB20-AS1	ZBTB20 antisense RNA 1	0.115655
2.41828	NM_012390	SMR3A	submaxillary gland androgen regulated protein 3A	0.115656
2.41873				0.115512
2.41998	NM_001142640	TNRC6C	trinucleotide repeat containing 6C	0.115589
2.42083	NM_001170704	MBNL3	muscleblind-like splicing regulator 3	0.121061
2.42314	NM_138782	FCHO2	FCH domain only 2	0.118979
2.42559	NM_024715	TXNDC15	thioredoxin domain containing 15	0.157646
2.42674	ENST00000433344			0.12181
2.42771	NM_005123	NR1H4	nuclear receptor subfamily 1, group H, member 4	0.126489
2.4288	NR_033873	LINC01122	long intergenic non-protein coding RNA 1122	0.115103
2.42906	NR_126025	LOC100128317	uncharacterized LOC100128317	0.121479
2.42961	NM_020747	ZNF608	zinc finger protein 608	0.115617
2.42992	NM_002166	ID2	inhibitor of DNA binding 2, dominant negative helix-loop-helix protein	0.122127
2.43174	NR_103810	LINC00540	long intergenic non-protein coding RNA 540	0.11881
2.43561	NM_016594	FKBP11	FK506 binding protein 11, 19 kDa	0.114828
2.44054	NM_015603	CCDC9	coiled-coil domain containing 9	0.114627
2.44767	NM_181501	ITGA1	integrin, alpha 1	0.140784
2.45057				0.13008
2.45634	NM_020692	GALNT16	polypeptide N-acetylgalactosaminyltransferase 16	0.11408
2.46745	NM_001286233	SLC2A14	solute carrier family 2 (facilitated glucose transporter), member 14	0.113627
2.4712	ENST00000458044	LOC101927851	uncharacterized LOC101927851	0.113578
2.48128	TCONS_l2_00014690	XLOC_l2_008130		0.118798
2.48878	NM_054108	HRASLS5	HRAS-like suppressor family, member 5	0.112837
2.49159	NM_138345	VWA5B2	von Willebrand factor A domain containing 5B2	0.124291
2.49443	NM_001286259	ADAT2	adenosine deaminase, tRNA-specific 2	0.112621
2.49937	NM_020064	BARHL1	BarH-like homeobox 1	0.127807
2.49951	NM_032413	C15orf48	chromosome 15 open reading frame 48	0.11244
2.5025	lnc-SEC24D-1:2	lnc-SEC24D-1	lnc-SEC24D-1:2	0.14867
2.50618	lnc-PLS3-2:1	lnc-PLS3-2	lnc-PLS3-2:1	0.150119
2.51912	NM_001032281	TFPI	tissue factor pathway inhibitor (lipoprotein-associated coagulation inhibitor)	0.116646
2.52979	AK130724			0.111919
2.5432	NM_006000	TUBA4A	tubulin, alpha 4a	0.110929
2.55473	NM_001850	COL8A1	collagen, type VIII, alpha 1	0.113871
2.55814	ENST00000558085			0.150676
2.55819	NR_105006	LINC01111	long intergenic non-protein coding RNA 1111	0.120701
2.5743	NM_004389	CTNNA2	catenin (cadherin-associated protein), alpha 2	0.148096
2.57494	NR_110219	LOC101927285	uncharacterized LOC101927285	0.109987
2.58189				0.109877
2.58241				0.118401
2.5829	ENST00000566611	KATNB1	katanin p80 (WD repeat containing) subunit B 1	0.133078
2.5868	NR_125425	LOC101927815	uncharacterized LOC101927815	0.10967
2.59391	NM_004417	DUSP1	dual specificity phosphatase 1	6.98059e-09
2.5959	NM_182491	ZFAND2A	zinc finger, AN1-type domain 2A	0.109818
2.61776	NM_003020	SCG5	secretogranin V (7B2 protein)	0.14255
2.6242	NM_005767	LPAR6	lysophosphatidic acid receptor 6	0.111345
2.62641	NM_003034	ST8SIA1	ST8 alpha-N-acetyl-neuraminide alpha-2,8-sialyltransferase 1	0.10844
2.62873	NM_000364	TNNT2	troponin T type 2 (cardiac)	0.138409
2.64403	NM_198511	LANCL3	LanC lantibiotic synthetase component C-like 3 (bacterial)	0.107831
2.64825	NM_002130	HMGCS1	3-hydroxy-3-methylglutaryl-CoA synthase 1 (soluble)	0.107859
2.65932	TCONS_l2_00024809	XLOC_l2_013031		0.107315
2.66526	lnc-SMCR7-1:1	lnc-SMCR7-1	lnc-SMCR7-1:1	0.126251
2.68756				0.106515
2.70522	lnc-HIVEP1-2:3	lnc-HIVEP1-2	lnc-HIVEP1-2:3	0.10981
2.72799	lnc-IDH2-1:1	lnc-IDH2-1	lnc-IDH2-1:1	0.119425
2.73077	NM_001171689	AMMECR1	Alport syndrome, mental retardation, midface hypoplasia and elliptocytosis chromosomal region gene 1	0.105393
2.73825	NM_004083	DDIT3	DNA-damage-inducible transcript 3	0.105314
2.74048	NM_001003790	ERLIN2	ER lipid raft associated 2	0.108583
2.78086	NM_002661	PLCG2	phospholipase C, gamma 2 (phosphatidylinositol-specific)	0.10637
2.78127	lnc-RP11-688I9.2.1-1:1	lnc-RP11-688I9.2.1-1	lnc-RP11-688I9.2.1-1:1	0.110309
2.78896	NM_006869	ADAP1	ArfGAP with dual PH domains 1	0.105874
2.80003	NM_001006658	CR2	complement component (3d/Epstein Barr virus) receptor 2	0.116226
2.82149	BX648603			0.103058
2.82787	NM_022873	IFI6	interferon, alpha-inducible protein 6	0.103055
2.82792	NR_104326	THOC7-AS1	THOC7 antisense RNA 1	0.103527
2.86377	NM_021127	PMAIP1	phorbol-12-myristate-13-acetate-induced protein 1	0.102169
2.89165	XR_424364	LOC102724074	uncharacterized LOC102724074	0.102314
2.89319	ENST00000561182	LOC101928850	uncharacterized LOC101928850	0.129188
2.89337	ENST00000511794			0.130039
2.9076	lnc-NAV3-1:10	lnc-NAV3-1	lnc-NAV3-1:10	0.121798
2.94036	NM_005987	SPRR1A	small proline-rich protein 1A	0.100416
2.9636	NM_002193	INHBB	inhibin, beta B	0.103609
2.9756	NM_001040058	SPP1	secreted phosphoprotein 1	3.22141e-09
2.99667	NM_020180	CELF4	CUGBP, Elav-like family member 4	0.102372
3.02606	NM_017787	WBP1L	WW domain binding protein 1-like	0.102006
3.07649	NM_175061	JAZF1	JAZF zinc finger 1	0.100065
3.08246	ENST00000419300	LINC00963	long intergenic non-protein coding RNA 963	0.100594
3.10291	NM_001278717	FXYD1	FXYD domain containing ion transport regulator 1	0.119219
3.10338	NR_003286	RNA18S5	RNA, 18S ribosomal 5	0.097262
3.11958	NM_152432	ARHGAP42	Rho GTPase activating protein 42	0.112414
3.18534	NM_018476	BEX1	brain expressed, X-linked 1	0.0959655
3.19089	NM_145045	CCDC151	coiled-coil domain containing 151	0.0994603
3.19437	NM_003389	CORO2A	coronin, actin binding protein, 2A	0.100722
3.26879	NR_105000	LOC100506526	uncharacterized LOC100506526	0.0964199
3.29915	NM_001285486	NEURL3	neuralized E3 ubiquitin protein ligase 3	0.101885
3.36388	NR_040022	LOC100289495	uncharacterized LOC100289495	0.114142
3.41792	lnc-ARHGEF5-2:2	lnc-ARHGEF5-2	lnc-ARHGEF5-2:2	0.144897
3.4534	NM_006084	IRF9	interferon regulatory factor 9	0.0929512
3.48258	NR_015453	NOP14-AS1	NOP14 antisense RNA 1	0.100969
3.49282	NM_005883	APC2	adenomatosis polyposis coli 2	0.0949042
3.50021	NR_110121	LOC101928791	uncharacterized LOC101928791	0.226025
3.64311	ENST00000376248	GAD2	glutamate decarboxylase 2 (pancreatic islets and brain, 65kDa)	0.103668
3.86533	NM_003378	VGF	VGF nerve growth factor inducible	0.0874774
3.89067	NM_173582	PGM2L1	phosphoglucomutase 2-like 1	0.0894427
4.01858	NM_014314	DDX58	DEAD (Asp-Glu-Ala-Asp) box polypeptide 58	0.0861783
4.07225	NM_016300	ARPP21	cAMP-regulated phosphoprotein, 21kDa	0.0877247
4.15096	XR_245037	LOC101928152	uncharacterized LOC101928152	0.0990532
4.15844	ENST00000590022			0.0874444
4.2624	NM_024625	ZC3HAV1	zinc finger CCCH-type, antiviral 1	0.0930218
4.44756	NM_001547	IFIT2	interferon-induced protein with tetratricopeptide repeats 2	0.0830585
4.58429	NM_001547	IFIT2	interferon-induced protein with tetratricopeptide repeats 2	0.0861647
4.77884	NM_002201	ISG20	interferon stimulated exonuclease gene 20kDa	0.0811009
4.99586	NM_016323	HERC5	HECT and RLD domain containing E3 ubiquitin protein ligase 5	0.0800638
5.69192	NM_002514	NOV	nephroblastoma overexpressed	0.0822365
5.73772	ENST00000416124	LOC102724231	uncharacterized LOC102724231	0.0929791
5.76898	NM_016564	CEND1	cell cycle exit and neuronal differentiation 1	0.0771467
7.43785	NM_014314	DDX58	DEAD (Asp-Glu-Ala-Asp) box polypeptide 58	0.0734378
7.54637	NM_001289758	IFIT3	interferon-induced protein with tetratricopeptide repeats 3	0.0729481
7.68233	NM_017631	DDX60	DEAD (Asp-Glu-Ala-Asp) box polypeptide 60	0.0730869
7.69552	NM_002521	NPPB	natriuretic peptide B	0.0732229
8.97893	NM_005101	ISG15	ISG15 ubiquitin-like modifier	0.0708762
9.75474	NM_001548	IFIT1	interferon-induced protein with tetratricopeptide repeats 1	0.0700754
12.3328	NM_003733	OASL	2'-5'-oligoadenylate synthetase-like	0.0683726
16.9864	NM_006417	IFI44	interferon-induced protein 44	0.0663265
